# Supplementary material for: Unveiling sex-based differences in developing propionic acid-induced features in mice as a rodent model of ASD
Source: PeerJ journal article supplement (doi:10.7717/peerj.15488), 2023-06-13

**Figure:** Alterations in repetitive behavior in PPA treated male and female mice groups compared to control (N=6). \* and \*\* show statistically significant difference at  $P < 0.05$  and  $P < 0.01$ , respectively from the control group by t-test.

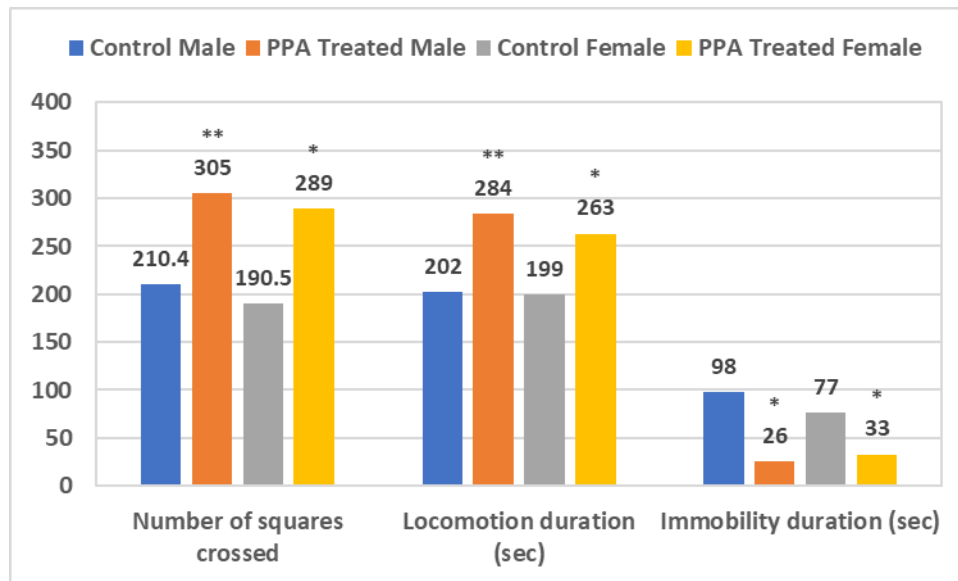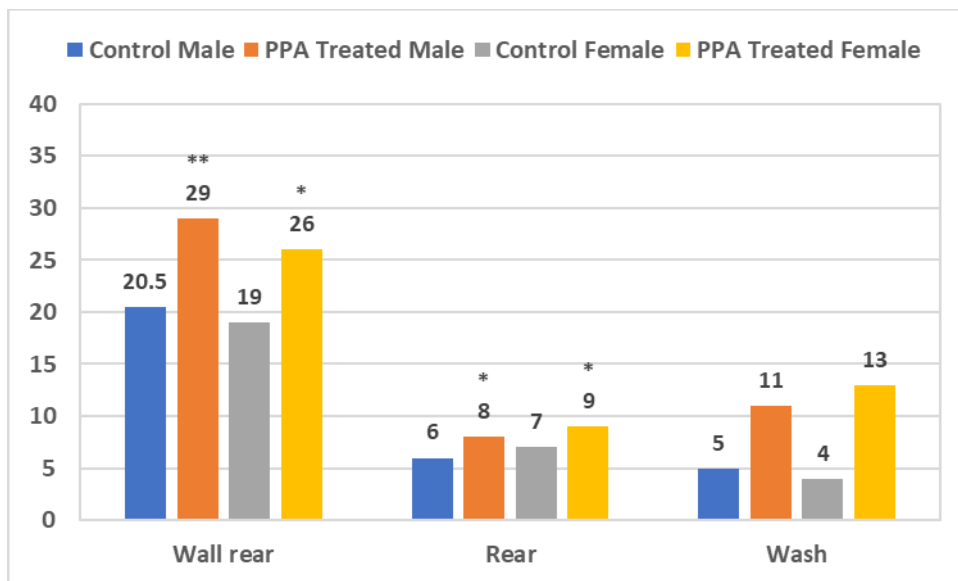

Supplement: Supplementary_data.pdf [file Supplementary_data.pdf]
